# Supplementary material
Source: Springer Nature journal article supplement (https://www.springermedizin.de/resource/supplementary/12974_2011_428_MOESM3_ESM.pdf/9601274)

### Microglial cells in the central avascular zone

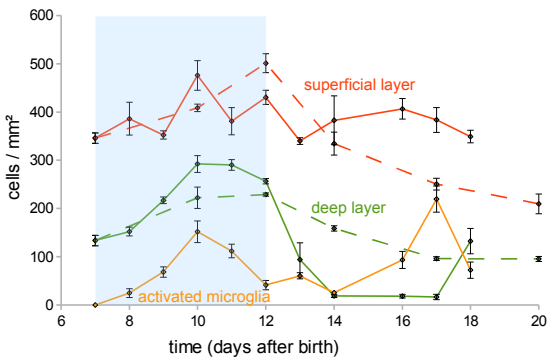

### Microglial cells in the peripheral zone

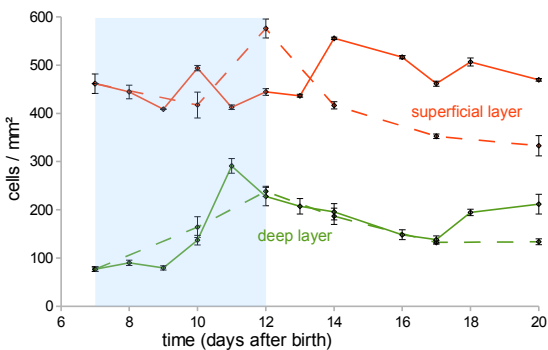

### Hyalocytes in the vitreous

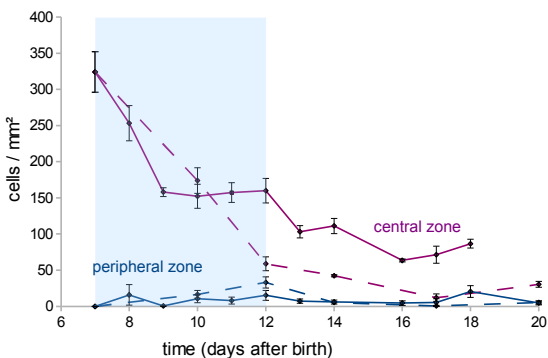

Supplement: MOESM3 [file 9601274]
